# Supplementary material
Source: PubMed Central journal article supplement (PMC4447225)
Supplement: supp_fj.15-270363_Supplemental_Figure1.pdf [file supp_fj.15-270363_Supplemental_Figure1.pdf]

Supplemental Figure 1

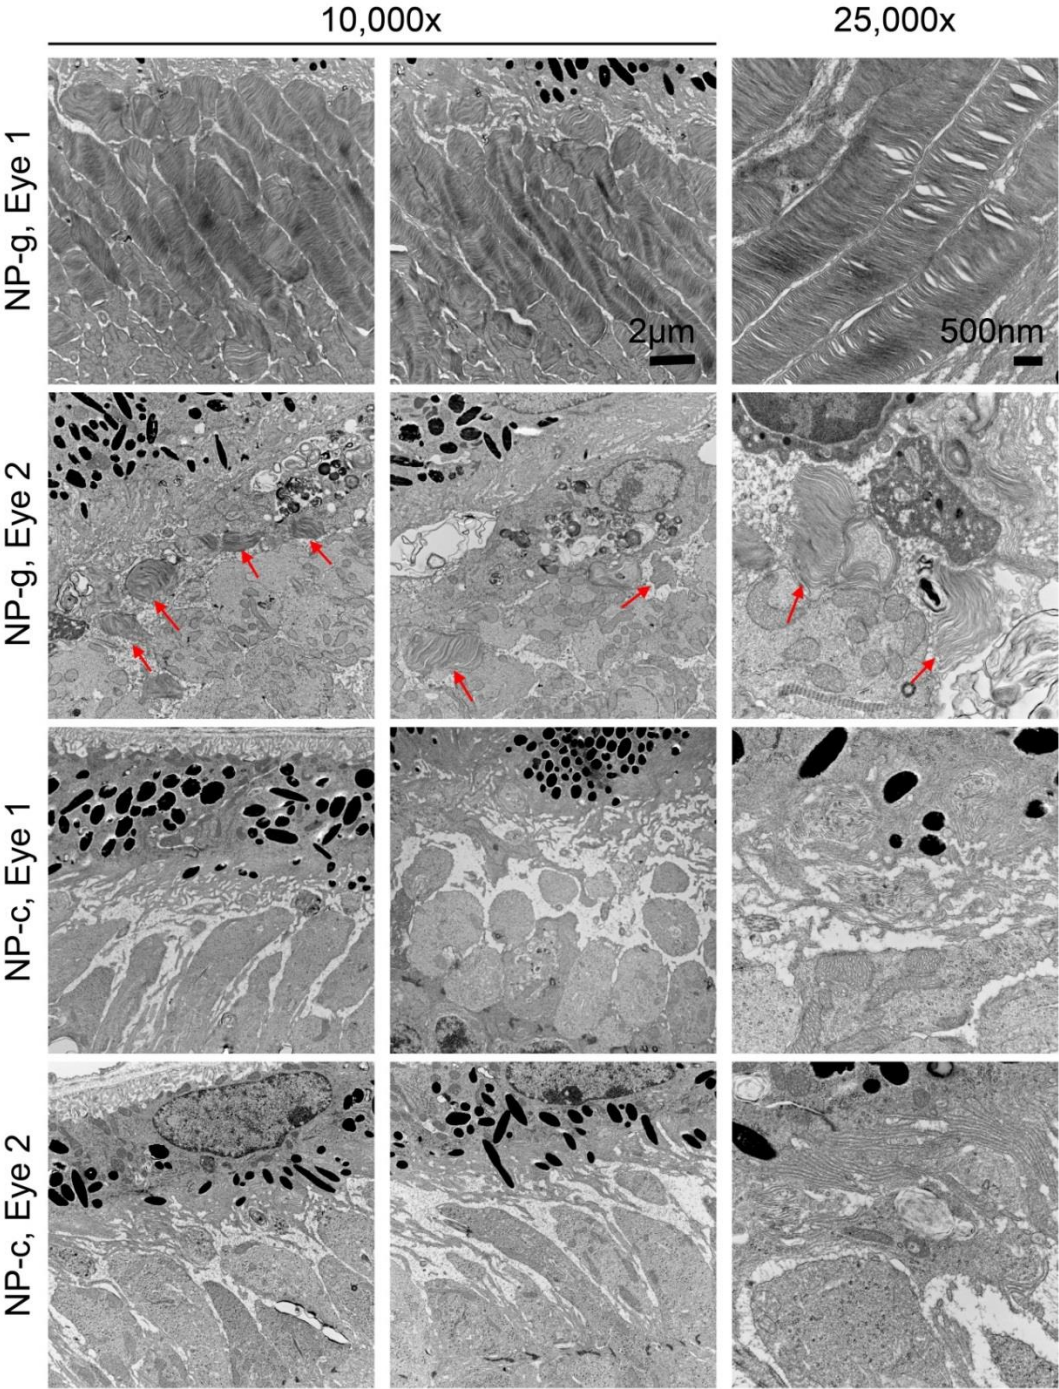

**Supplemental Figure 1:** Shown are EMs from 4 different eyes injected with either NP-g or NP-c as indicated. Each row represents images from the same eye. The left two columns are 10,000x magnification while the right column is 25,000x. Red arrows indicate OSs.
